# Supplementary material for: The Chemometric Evaluation of the Factors Influencing Cloud Point Extraction for Fluoroquinolones
Source: MDPI journal article supplement (doi:10.3390/pharmaceutics15061774), 2023-06-20
Supplement: s1 [file s1]

## Supplementary information for 'The Chemometric Evaluation of the Factors Influencing Cloud Point Extraction for Fluoroquinolones'

1. The chromatograms for the analyzed compounds.

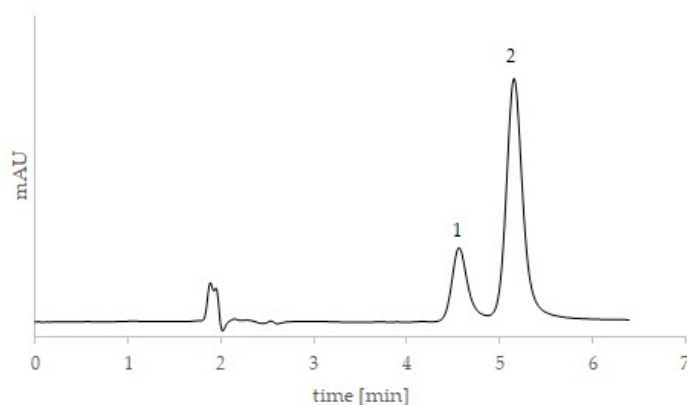

**Figure S1.** The chromatogram for CIPRO analysis (1 – internal standard, retention time: 4.6 min; 2 – CIPRO, retention time: 5.2 min). The peak's parameters for CIPRO – area under the peak – 109.2 [mAu\*s]; symmetry – 1.1; tailing factor – 1.2; number of theoretical plates – 4379; resolution to the IS peak  $R_s$  – 1.94).

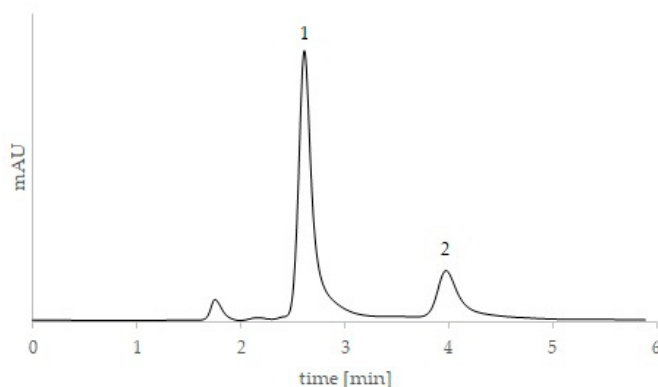

**Figure S2.** The chromatogram for LEVO analysis (1 – LEVO, retention time: 2.6 min; 2 – internal standard: retention time – 3.9 min). The peak's parameters for LEVO – area under the peak – 134.1 [mAU\*s]; symmetry – 1.3; tailing factor – 1.4; number of theoretical plates – 2511; resolution to the IS peak  $R_s$  – 4.6).

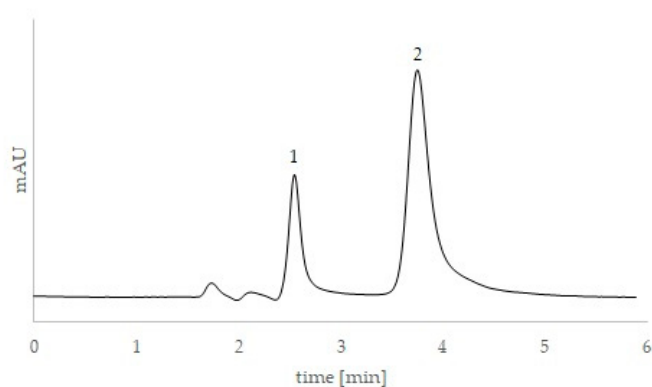

**Figure S3.** The chromatogram for MOXI analysis (1 – internal standard, retention time: 2.6 min; 2 – MOXI, retention time: 3.7 min). The peak's parameters for MOXI – area under the peak – 85.1 [mAU\*s]; symmetry – 1.3; tailing factor – 1.4; number of theoretical plates – 2250; resolution to the IS peak  $R_s$  – 4.1).

The equations of linear correlation for the analyzed compounds are:

Equation for CIPRO:  $y = 0.6617x$

Equation for LEVO:  $y = 0.2653x$

Equation for MOXI:  $y = 0.2169x$

2. The results of the experiments for the analyzed compounds are:

**Table S1.** The results for the experiments for CIPRO.

| TX-114 | NaCl | pH | Temperature | Recovery [%] |
|--------|------|----|-------------|--------------|
| 2      | 0    | 0  | 0           | 20.88        |
| -1     | 1    | 1  | 1           | 12.47        |
| -1     | -1   | -1 | -1          | 36.12        |
| -1     | -1   | -1 | 1           | 28.79        |
| -1     | 1    | 1  | -1          | 16.60        |
| 1      | -1   | 1  | 1           | 26.67        |
| 0      | 0    | -2 | 0           | 40.52        |
| 0      | 2    | 0  | 0           | 30.78        |
| 1      | -1   | 1  | -1          | 22.49        |
| 0      | 0    | 0  | 0           | 27.64        |
| 1      | 1    | -1 | 1           | 28.44        |
| 1      | 1    | -1 | -1          | 31.62        |
| 0      | 0    | 2  | 0           | 14.00        |
| -2     | 0    | 0  | 0           | 7.84         |
| 0      | -2   | 0  | 0           | 35.02        |
| -1     | -1   | 1  | -1          | 14.91        |
| -1     | -1   | 1  | 1           | 11.35        |
| -1     | 1    | -1 | -1          | 33.42        |
| -1     | 1    | -1 | 1           | 27.93        |
| 1      | -1   | -1 | -1          | 38.21        |
| 1      | -1   | -1 | 1           | 36.54        |
| 1      | 1    | 1  | -1          | 18.78        |
| 1      | 1    | 1  | 1           | 20.97        |
| 0      | 0    | 0  | -2          | 30.98        |
| 0      | 0    | 0  | 2           | 25.13        |
| 0      | 0    | 0  | 0           | 26.30        |
| 0      | 0    | 0  | 0           | 27.57        |

**Table S2.** The results for the experiments for LEVO.

| TX-114 | NaCl | pH | Temperature | Recovery [%] |
|--------|------|----|-------------|--------------|
| 2      | 0    | 0  | 0           | 47.32        |
| -1     | 1    | 1  | 1           | 9.27         |
| -1     | -1   | -1 | -1          | 28.82        |
| -1     | -1   | -1 | 1           | 27.62        |
| -1     | 1    | 1  | -1          | 14.96        |
| 1      | -1   | 1  | 1           | 39.49        |
| 0      | 0    | -2 | 0           | 43.94        |
| 0      | 2    | 0  | 0           | 30.73        |
| 1      | -1   | 1  | -1          | 53.24        |
| 0      | 0    | 0  | 0           | 30.41        |
| 1      | 1    | -1 | 1           | 51.48        |
| 1      | 1    | -1 | -1          | 47.07        |
| 0      | 0    | 2  | 0           | 29.76        |
| -2     | 0    | 0  | 0           | 6.07         |
| 0      | -2   | 0  | 0           | 45.74        |
| -1     | -1   | 1  | -1          | 41.49        |
| -1     | -1   | 1  | 1           | 27.51        |
| -1     | 1    | -1 | -1          | 27.23        |
| -1     | 1    | -1 | 1           | 30.14        |
| 1      | -1   | -1 | -1          | 44.82        |
| 1      | -1   | -1 | 1           | 46.67        |
| 1      | 1    | 1  | -1          | 38.75        |
| 1      | 1    | 1  | 1           | 24.67        |
| 0      | 0    | 0  | -2          | 46.08        |
| 0      | 0    | 0  | 2           | 35.00        |
| 0      | 0    | 0  | 0           | 31.28        |
| 0      | 0    | 0  | 0           | 31.42        |

**Table S3.** The results for the experiments for MOXI.

| TX-114 | NaCl | pH | Temperature | Recovery [%] |
|--------|------|----|-------------|--------------|
| 2      | 0    | 0  | 0           | 43.55        |
| -1     | 1    | 1  | 1           | 18.37        |
| -1     | -1   | -1 | -1          | 41.12        |
| -1     | -1   | -1 | 1           | 33.23        |
| -1     | 1    | 1  | -1          | 19.51        |
| 1      | -1   | 1  | 1           | 30.19        |
| 0      | 0    | -2 | 0           | 64.97        |
| 0      | 2    | 0  | 0           | 36.76        |
| 1      | -1   | 1  | -1          | 31.62        |
| 0      | 0    | 0  | 0           | 40.27        |
| 1      | 1    | -1 | 1           | 60.32        |
| 1      | 1    | -1 | -1          | 59.06        |
| 0      | 0    | 2  | 0           | 22.13        |
| -2     | 0    | 0  | 0           | 21.24        |
| 0      | -2   | 0  | 0           | 29.63        |
| -1     | -1   | 1  | -1          | 23.55        |
| -1     | -1   | 1  | 1           | 22.71        |
| -1     | 1    | -1 | -1          | 46.03        |
| -1     | 1    | -1 | 1           | 36.87        |
| 1      | -1   | -1 | -1          | 57.47        |
| 1      | -1   | -1 | 1           | 52.85        |
| 1      | 1    | 1  | -1          | 27.63        |
| 1      | 1    | 1  | 1           | 31.35        |
| 0      | 0    | 0  | -2          | 41.75        |
| 0      | 0    | 0  | 2           | 36.24        |
| 0      | 0    | 0  | 0           | 41.20        |
| 0      | 0    | 0  | 0           | 40.85        |

3. The full equations for recovery for the analysed compounds:

$$\text{Recovery}_{\text{CIPRO}} = 27.170 + 2.846 \times \text{TX-114} - 3.255 \times (\text{TX-114})^2 - 1.389 \times \text{NaCl} + 1.381 \times (\text{NaCl})^2 - 7.077 \times \text{pH} - 0.029 \times \text{pH}^2 - 1.278 \times \text{temperature} + 0.168 \times (\text{temperature})^2 - 1.460 \times \text{TX-114} \times \text{NaCl} + 1.564 \times \text{TX-114} \times \text{pH} + 1.377 \times \text{TX-114} \times \text{temperature} + 0.728 \times \text{NaCl} \times \text{pH} - 0.139 \times \text{NaCl} \times \text{temperature} + 1.022 \times \text{pH} \times \text{temperature}$$

$$\text{Recovery}_{\text{LEVO}} = 31.037 + 9.235 \times \text{TX-114} - 1.253 \times (\text{TX-114})^2 - 4.005 \times \text{NaCl} + 1.632 \times (\text{NaCl})^2 - 3.451 \times \text{pH} + 1.286 \times \text{pH}^2 - 2.570 \times \text{temperature} + 2.209 \times (\text{temperature})^2 + 1.349 \times \text{TX-114} \times \text{NaCl} - 0.832 \times \text{TX-114} \times \text{pH} - 0.226 \times \text{TX-114} \times \text{temperature} - 5.129 \times \text{NaCl} \times \text{pH} + 0.914 \times \text{NaCl} \times \text{temperature} - 3.467 \times \text{pH} \times \text{temperature}$$

$$\begin{aligned} \text{Recovery}_{\text{MOXI}} = & 40.773 + 6.405 \times \text{TX-114} - 2.101 \times (\text{TX-114})^2 + 0.861 \times \text{NaCl} - 1.901 \times (\text{NaCl})^2 - \\ & 11.154 \times \text{pH} + 0.687 \times \text{pH}^2 - 1.297 \times \text{temperature} - 0.451 \times (\text{temperature})^2 + 0.379 \times \text{TX-114} \times \text{NaCl} \\ & - 2.238 \times \text{TX-114} \times \text{pH} + 1.1225 \times \text{TX-114} \times \text{temperature} - 1.801 \times \text{NaCl} \times \text{pH} + 0.591 \times \text{NaCl} \times \\ & \text{temperature} + 1.295 \times \text{pH} \times \text{temperature} \end{aligned}$$
